# Supplementary material for: Tuning pore diameter of platelet SBA-15 materials with short mesochannels for enzyme adsorption
Source: Royal Society of Chemistry journal article supplement (doi:10.1039/c0jm03591b), 2011-01-01
Supplement: c0jm03591b.pdf [file c0jm03591b.pdf]

## **Supporting Information**

### **Tuning Pore Diameter of Platelet SBA-15 Materials with Short Mesochannels for Enzyme Adsorption**

Shih-Yuan Chen,<sup>a</sup> Yi-Ting Chen,<sup>b</sup> Jey-Jau Lee,<sup>c</sup> Soofin Cheng<sup>a\*</sup>

<sup>a</sup>Department of Chemistry, National Taiwan University, Taipei 106, Taiwan.

<sup>b</sup>Molecular Medicine Research Center, Chang Gung University, Tao-Yuan 333

Taiwan.

<sup>c</sup>Research Division, National Synchrotron Radiation Research Center, Hsinchu 300,

Taiwan.

To whom the correspondence should be addressed:

Prof. Soofin Cheng

TEL: +886-2-33661662

FAX: +886-2-23636359

E-mail: [chem1031@ntu.edu.tw](mailto:chem1031@ntu.edu.tw)

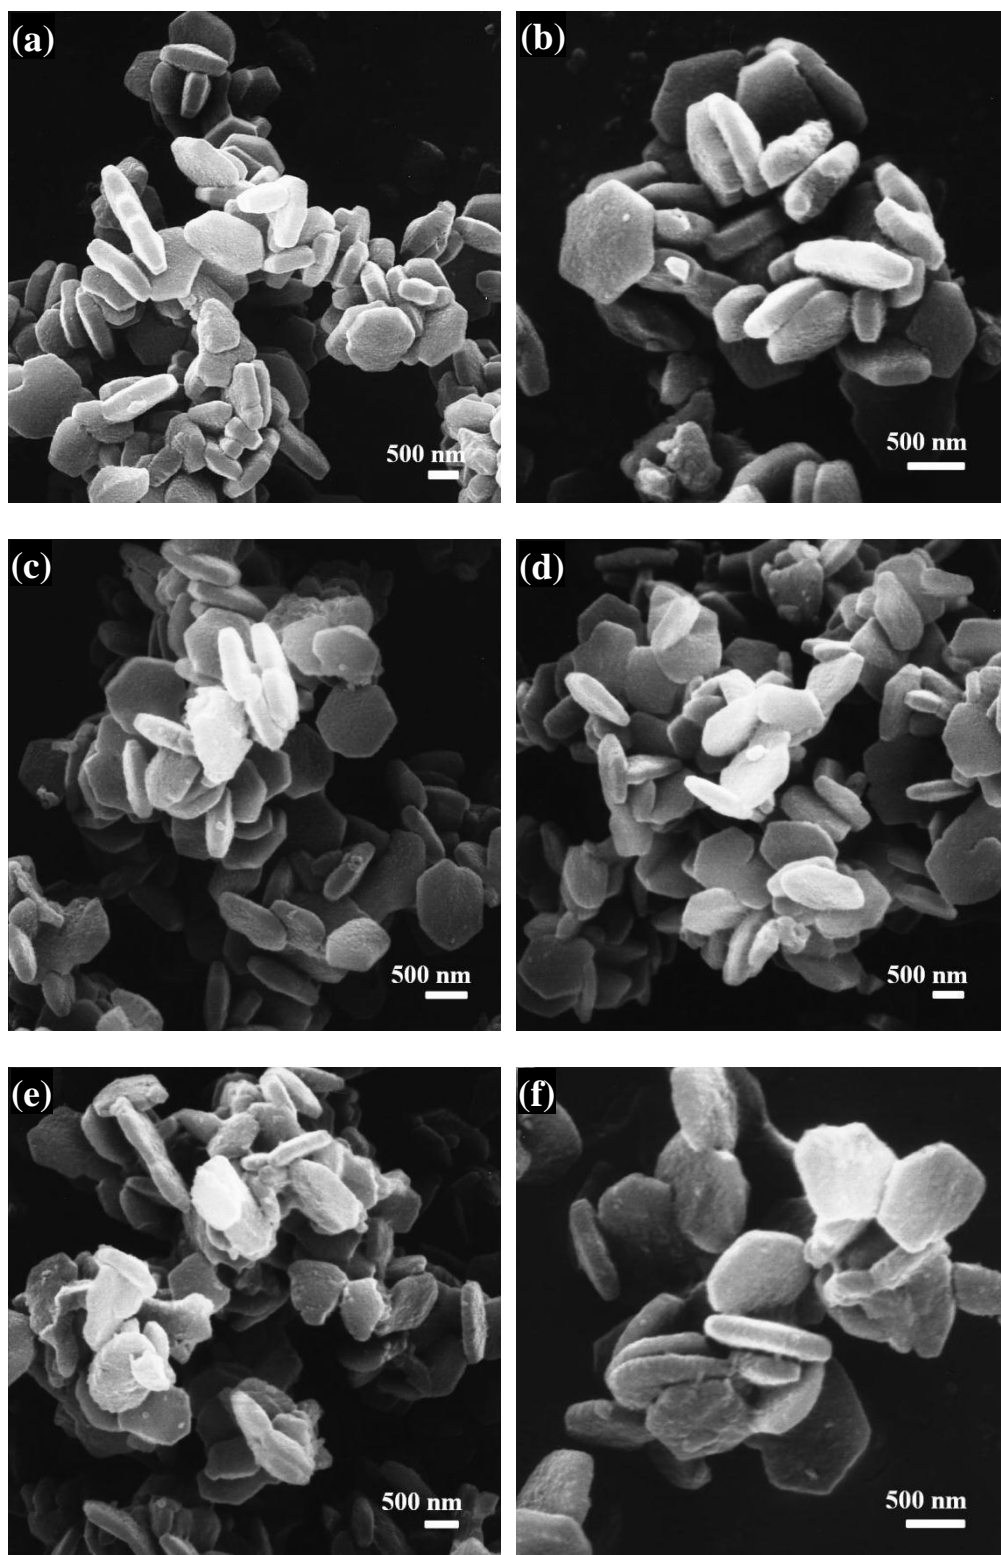

**Fig. S1.** SEM photographs of short-channel SBA-15-p materials prepared with TEOS pre-hydrolysis for 25 min and varying the TMB/P123 weight ratios of (a) 0, (b) 0.05, (c) 0.1, (d) 0.25, (e) 2, and (f) 2.5.

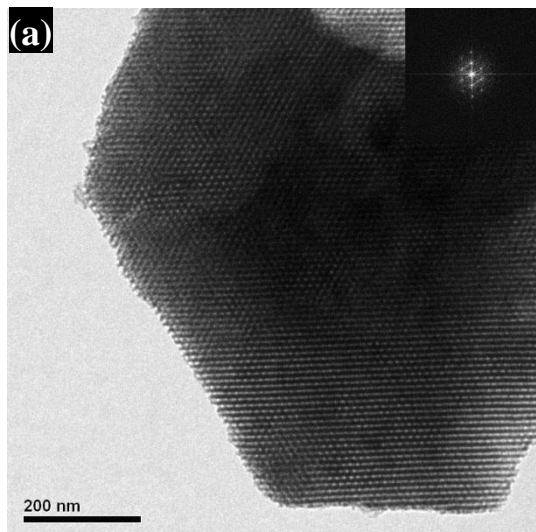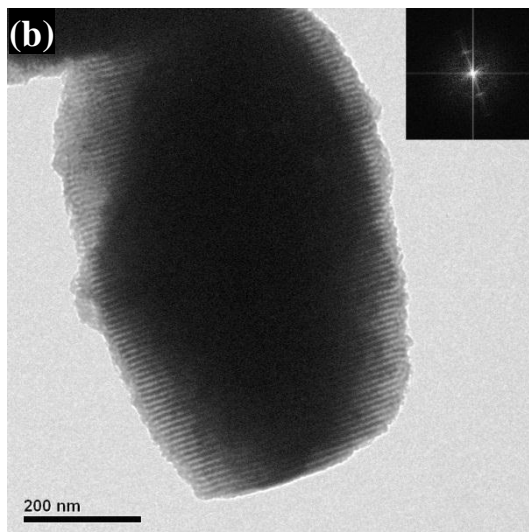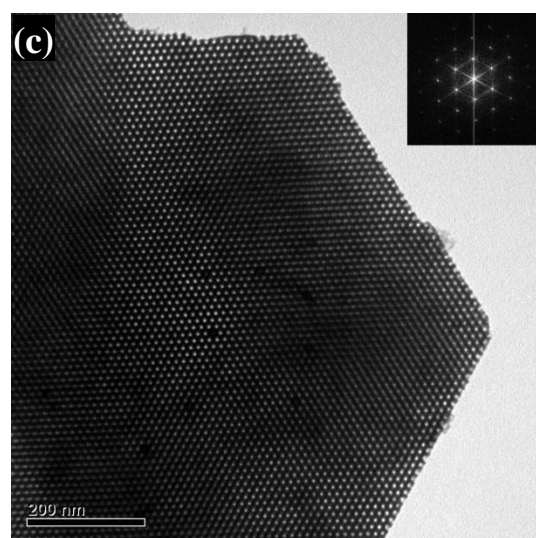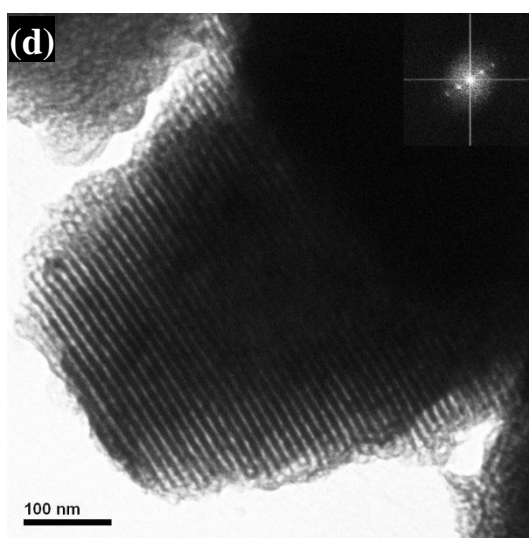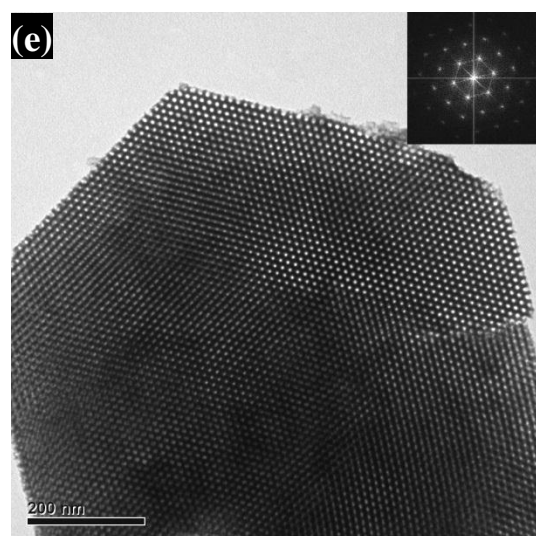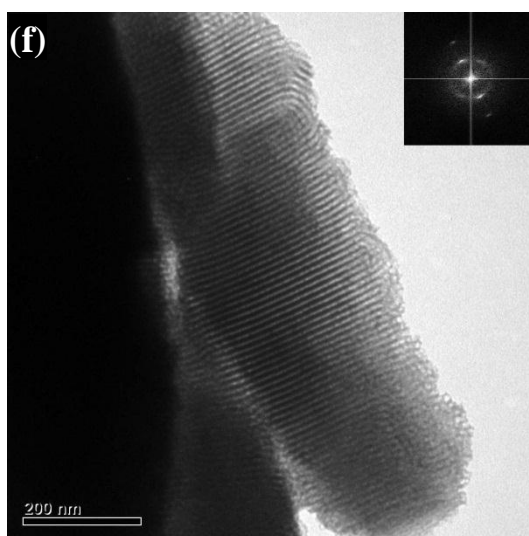

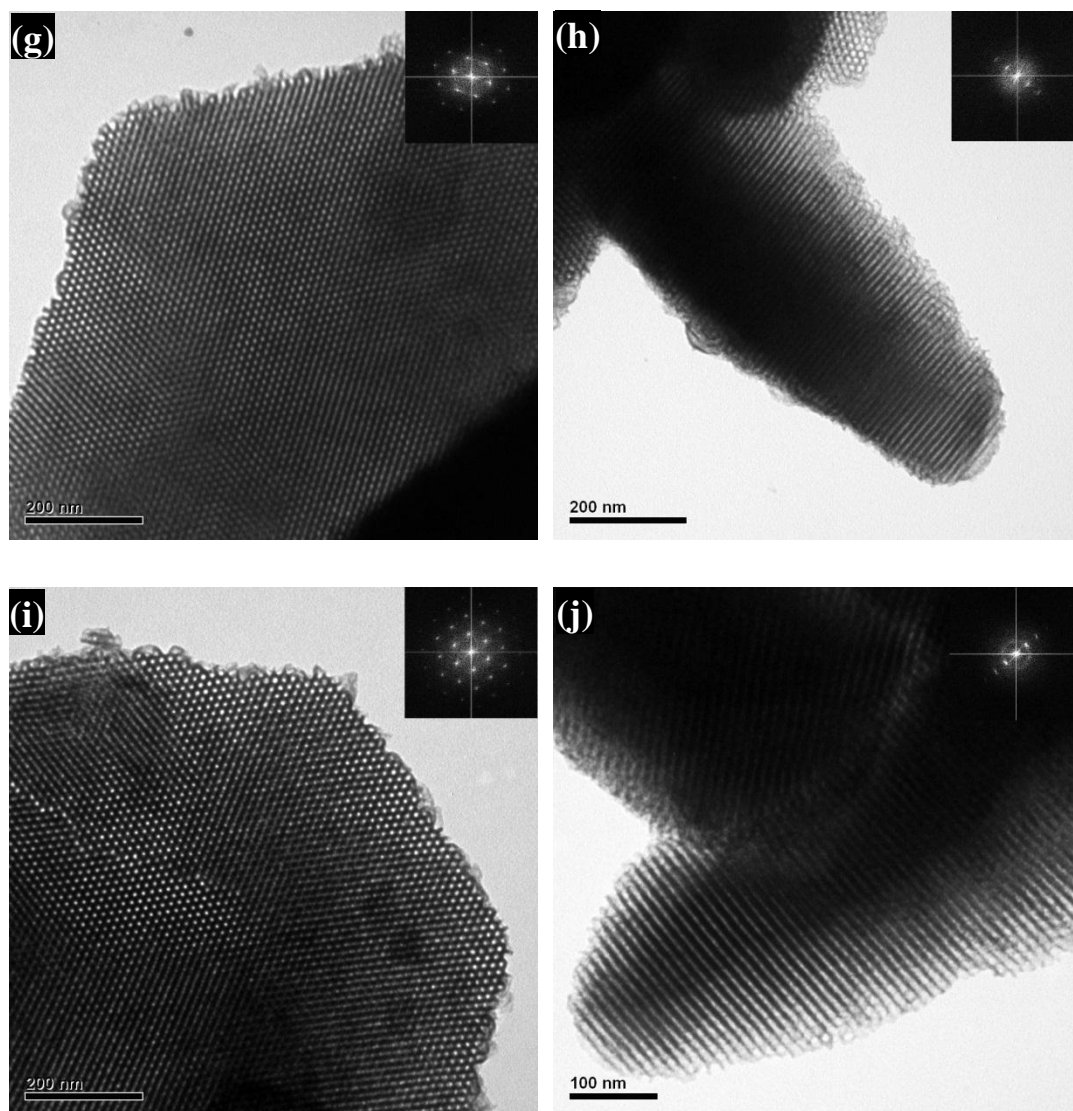

**Fig. S2.** TEM photographs of short-channel SBA-15-p materials prepared with TEOS pre-hydrolysis for 25 min and varying the TMB/P123 weight ratios of (a,b) 0, (c,d) 0.05, (e,f) 0.1, (g,h) 0.25, (i,j) 2.5.

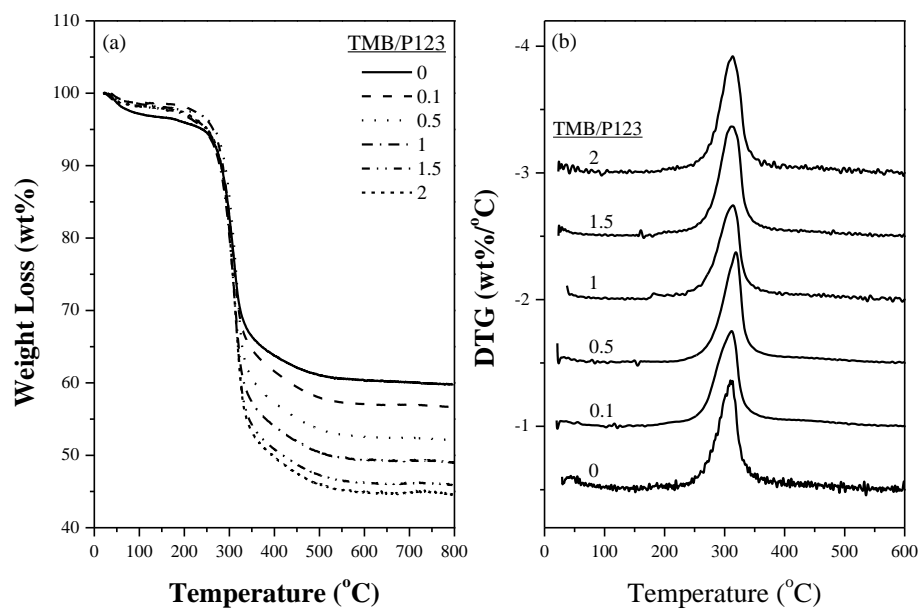

**Fig. S3.** (a) TG and (b) DTG profiles of SBA-15-p materials prepared with a TEOS pre-hydrolysis period of 25 min and various TMB/P123 weight ratios.

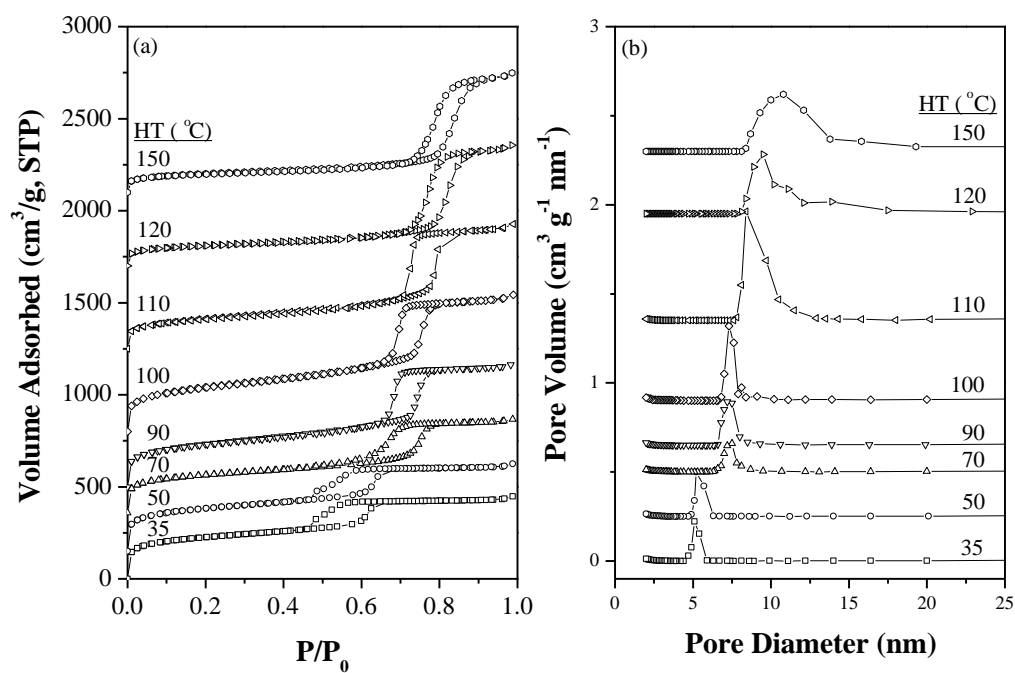

**Fig. S4.** (a) N<sub>2</sub> adsorption-desorption isotherms and (b) BdB-FHH adsorption PSD curves of SBA-15-p materials prepared with different hydrothermal temperatures, where no TMB is used in the synthesis.
